# Supplementary material for: A self-supported, three-dimensional porous copper film as a current collector for advanced lithium metal batteries
Source: Royal Society of Chemistry journal article supplement (doi:10.1039/c8ta09384a), 2018-11-29
Supplement: c8ta09384a1.pdf [file c8ta09384a1.pdf]

**Electronic Supplementary Information (ESI):**

**Self-supported, Three-Dimensional Porous Copper Film as Current  
Collector for Advanced Lithium Metal Batteries**

Yujun Shi,<sup>a</sup> Zhenbin Wang,<sup>a</sup> Hui Gao,<sup>a</sup> Jiazheng Niu,<sup>a</sup> Wensheng Ma,<sup>a</sup> Jingyu Qin,<sup>a</sup> Zhangquan Peng,<sup>b</sup> Zhonghua Zhang<sup>a,\*</sup>

<sup>a</sup>Key Laboratory for Liquid-Solid Structural Evolution and Processing of Materials (Ministry of Education), School of Materials Science and Engineering, Shandong University, Jingshi Road 17923, Jinan 250061, P.R. China

<sup>b</sup>State Key Laboratory of Electroanalytical Chemistry, Changchun Institute of Applied Chemistry, Chinese Academy of Sciences, Changchun, Jilin 130022, P.R. China

\*Corresponding author. Email: zh\_zhang@sdu.edu.cn (Z. Zhang).

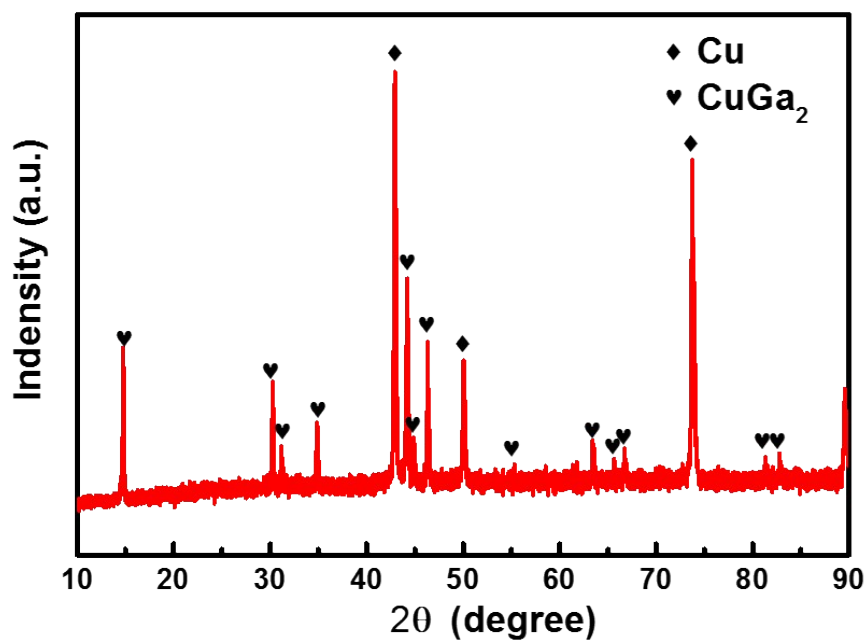

**Fig. S1.** XRD pattern of the liquid Ga-coated Cu foil after painting and annealing, indicating the formation of  $\text{CuGa}_2$  intermetallic phase on the surface of Cu foil.

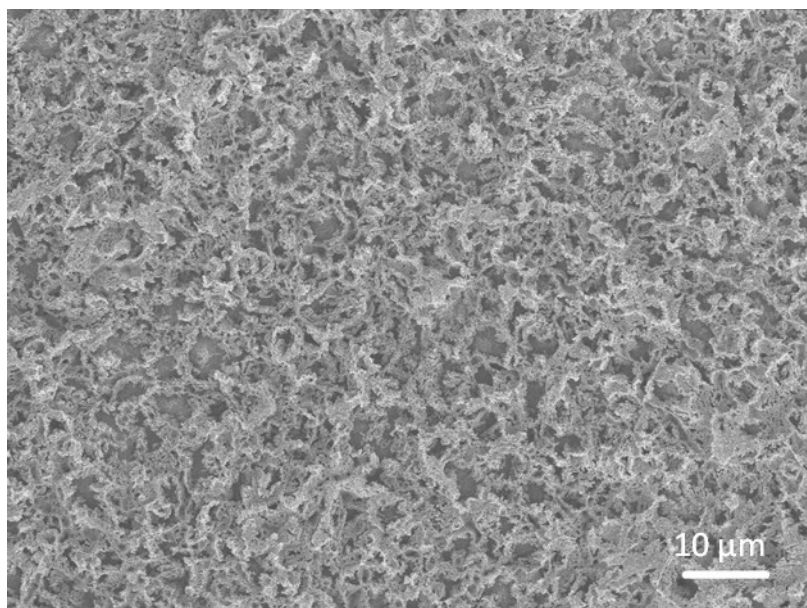

**Fig. S2.** SEM image of the 3D porous Cu foil.

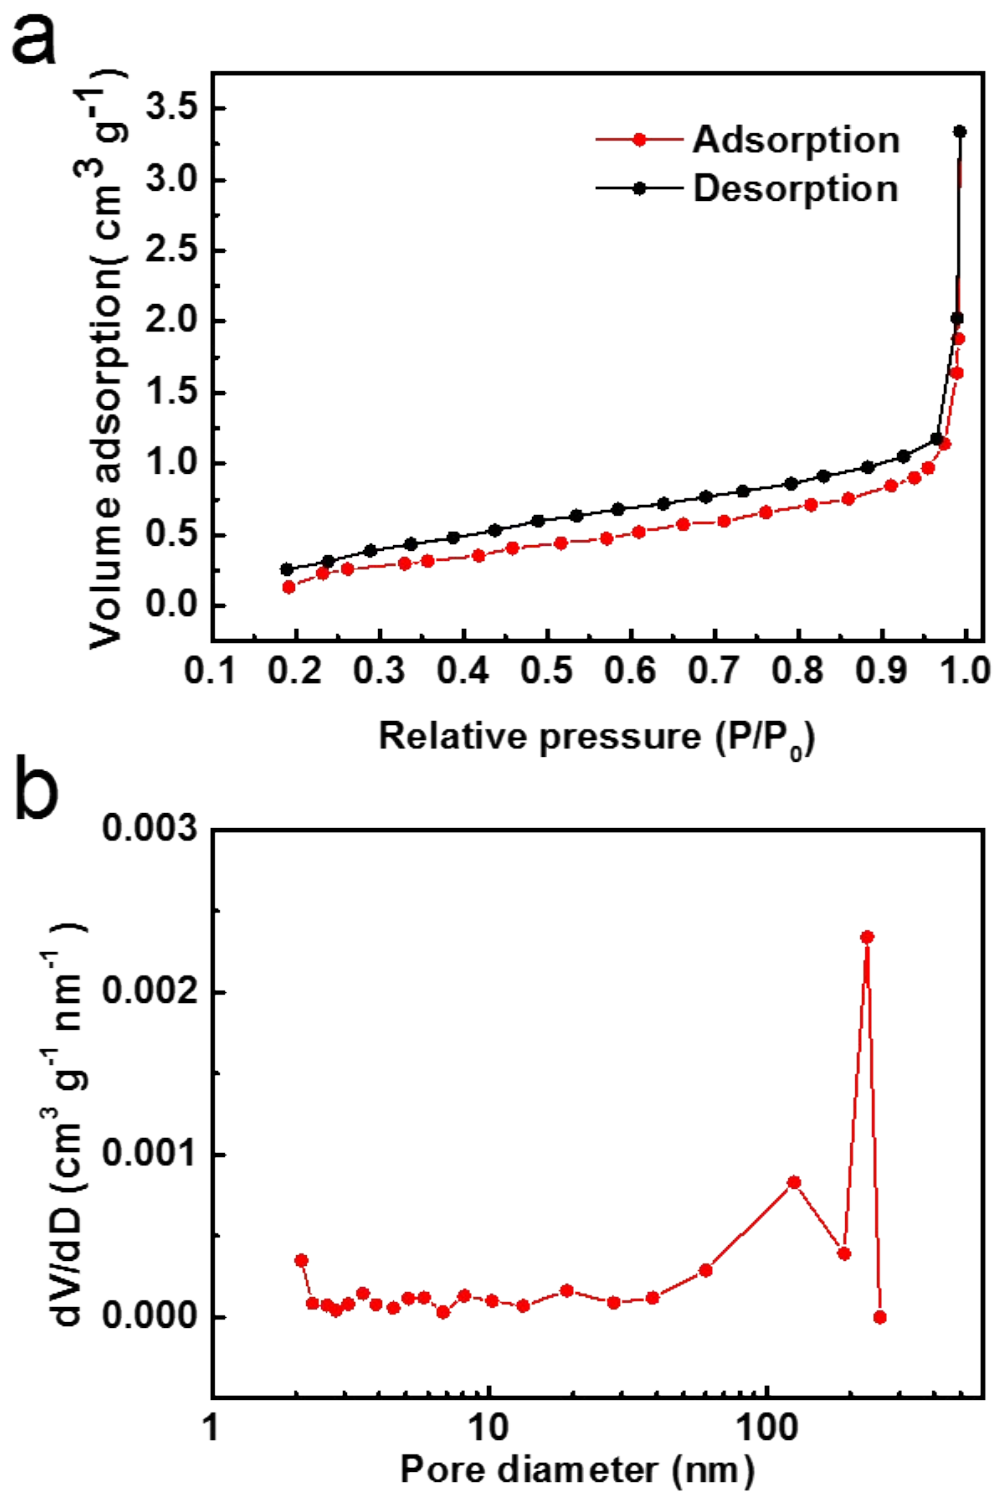

**Fig. S3.** (a)  $\text{N}_2$  adsorption –desorption isotherms and (b) the pore size distribution of the 3D porous Cu.

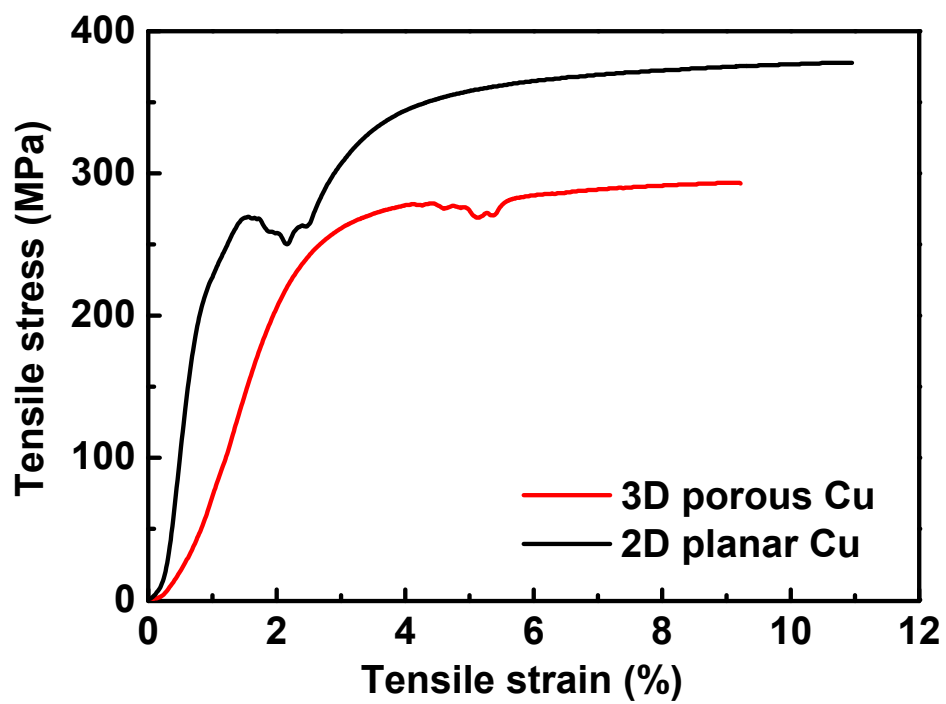

**Fig. S4.** The typical tensile stress-strain curves of the 3D porous Cu and 2D planar Cu samples.

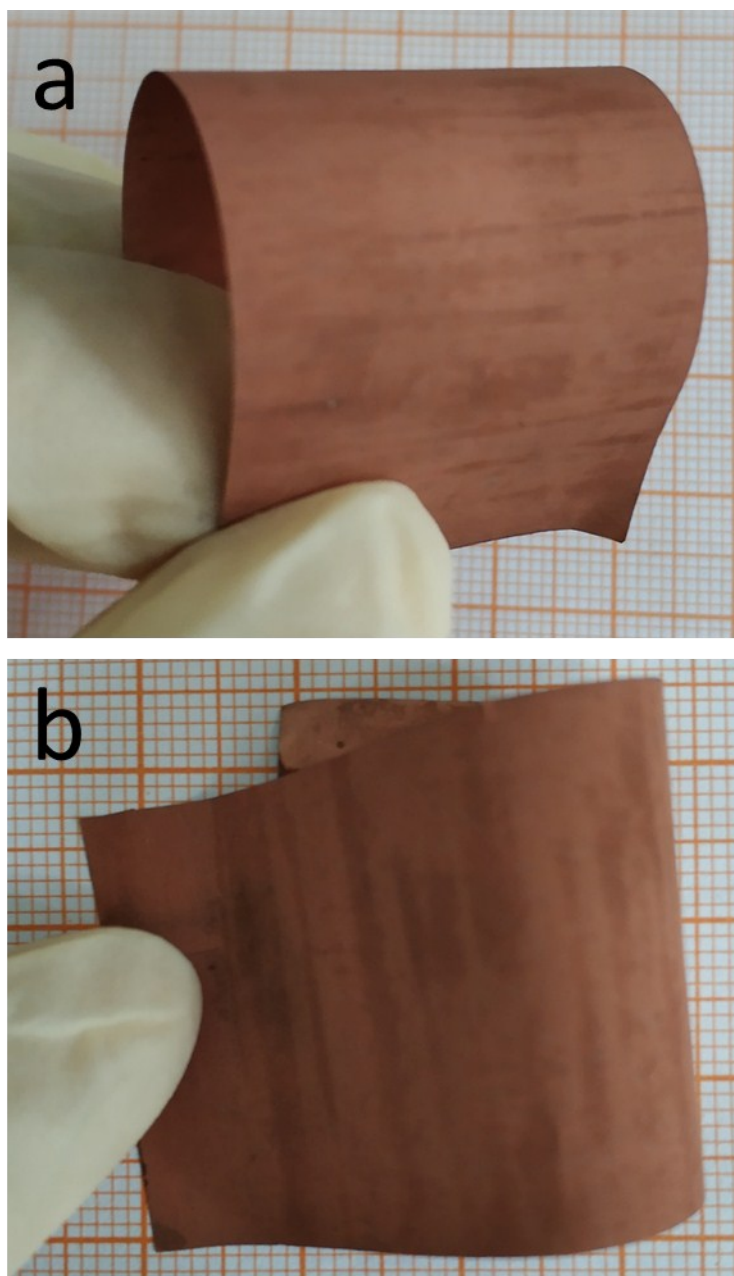

**Fig. S5.** Photographs showing the flexible, self-supported nature of the 3D porous Cu sample which is similar to that of the pristine Cu foil.

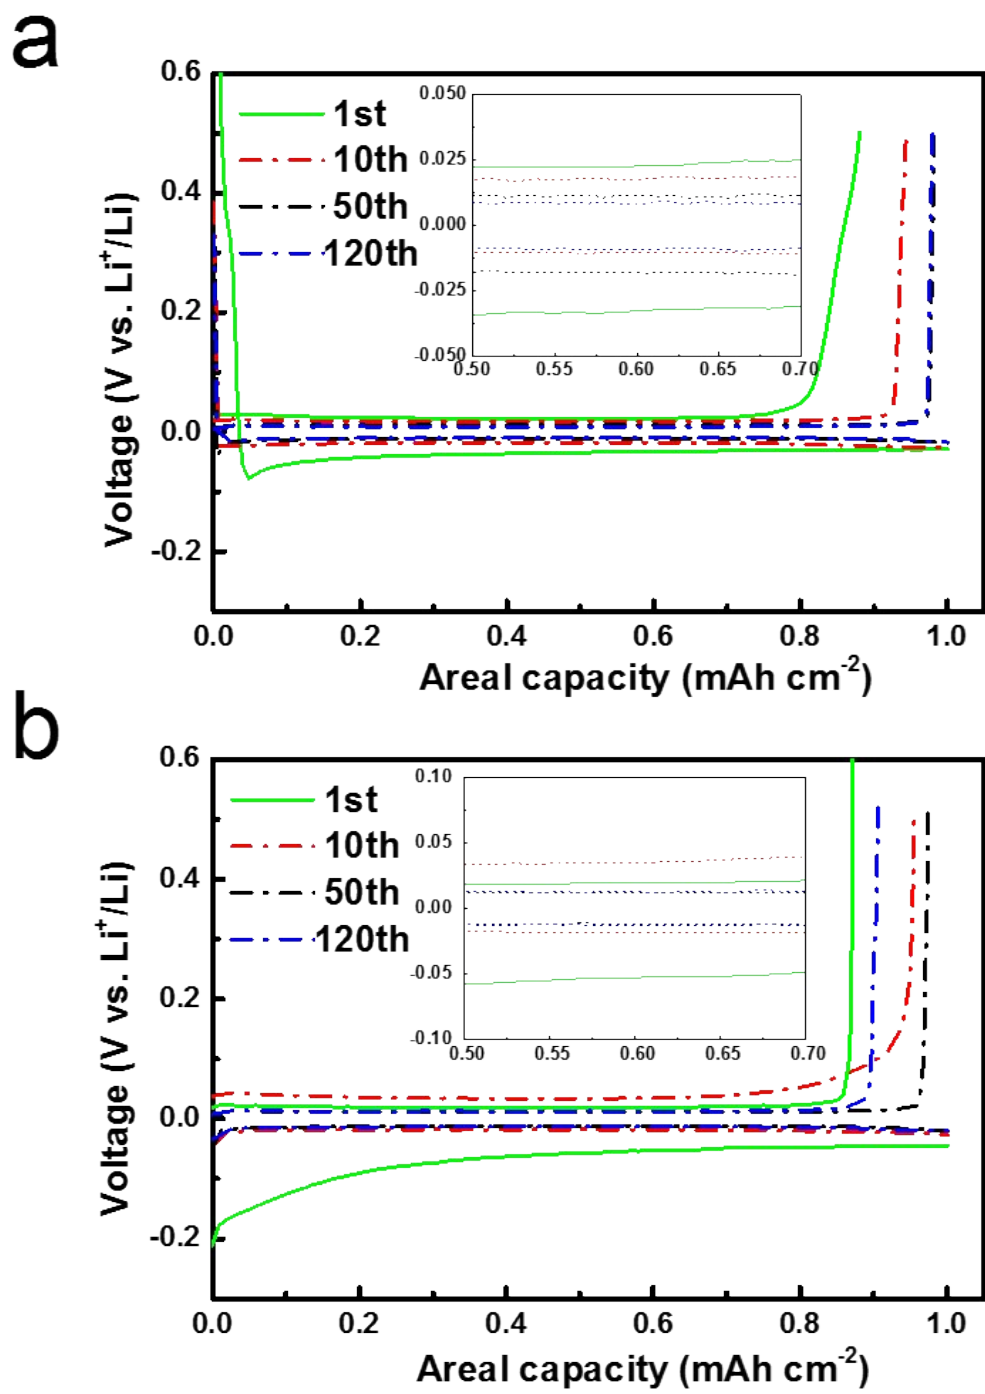

**Fig. S6.** Voltage profiles of Li plating/stripping on the (a) 3D porous current collector and (b) 2D planar current collector at 0.5 mA cm<sup>-2</sup> for total capacity of 1 mAh cm<sup>-2</sup>.

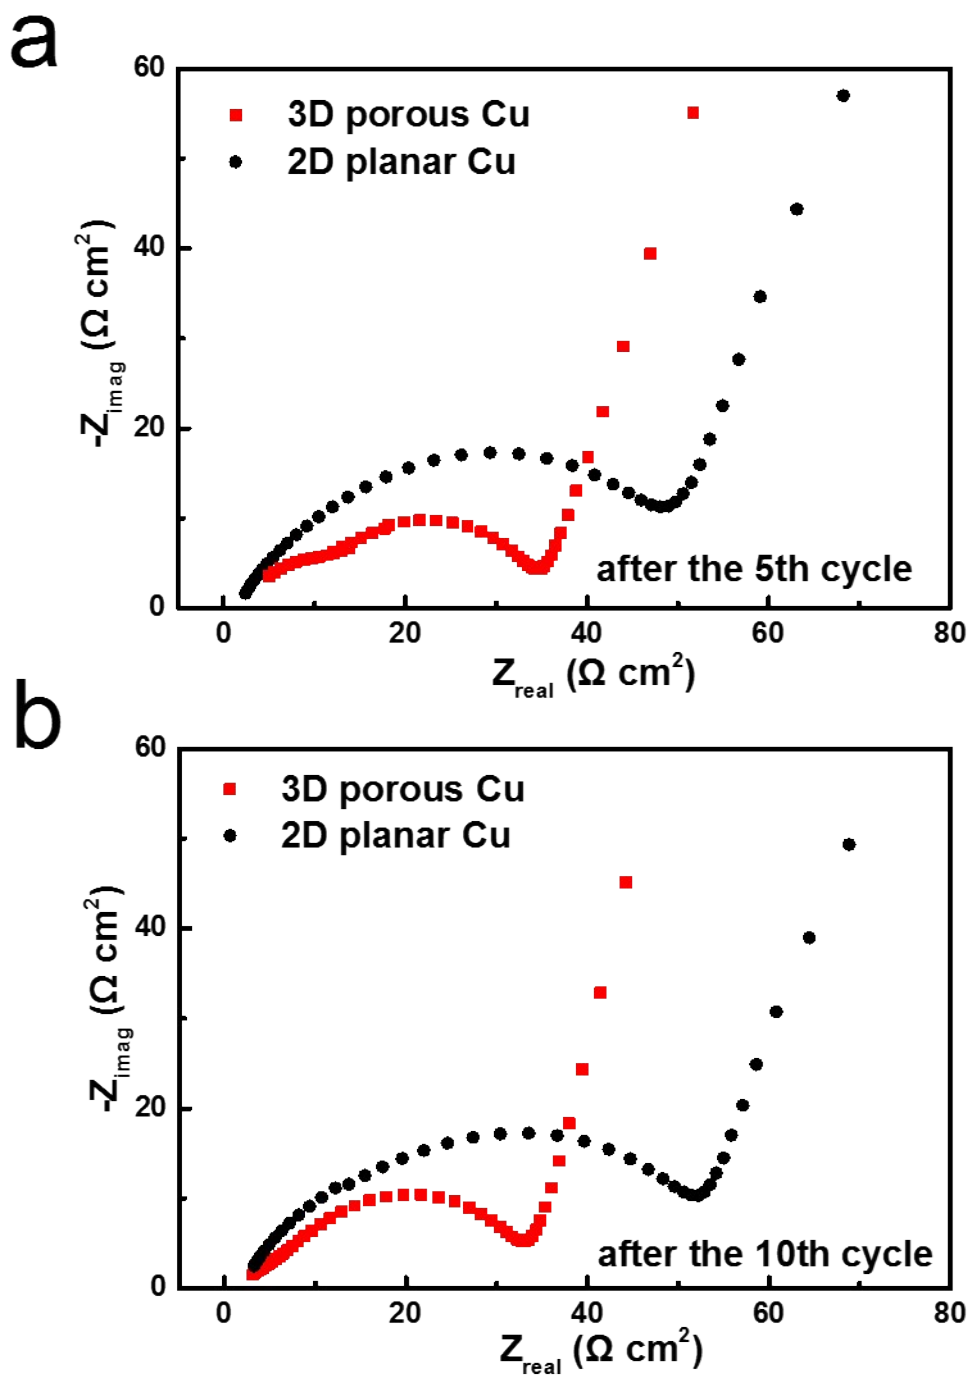

**Fig. S7.** EIS spectra of the 2D planar Cu and 3D porous current collectors after (c) 5 and (d) 10 cycles.



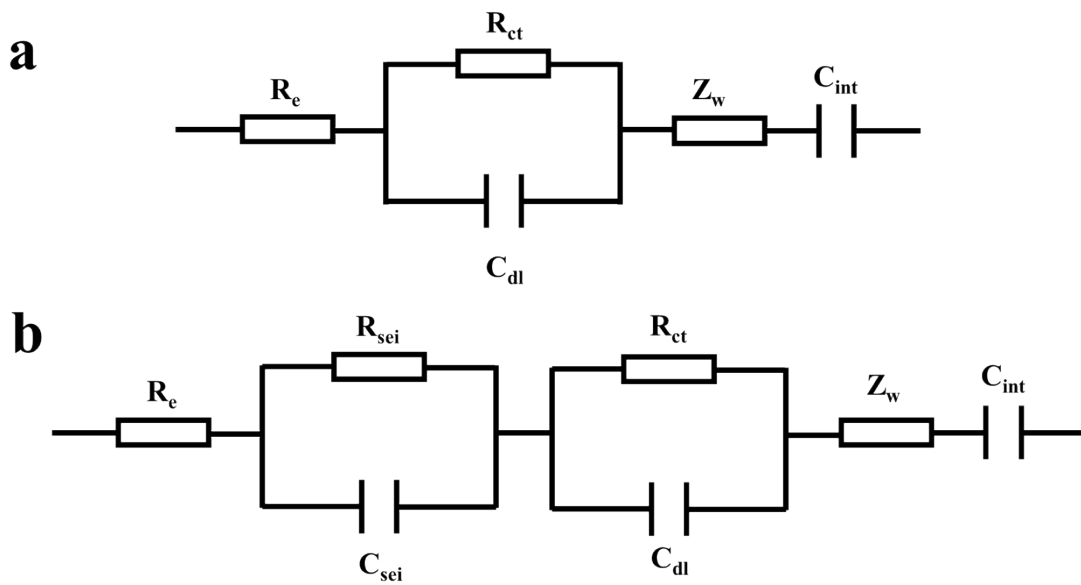

**Fig. S8.** Equivalent electrical circuits corresponding to Nyquist plots (a) before cycling and (b) after cycling.

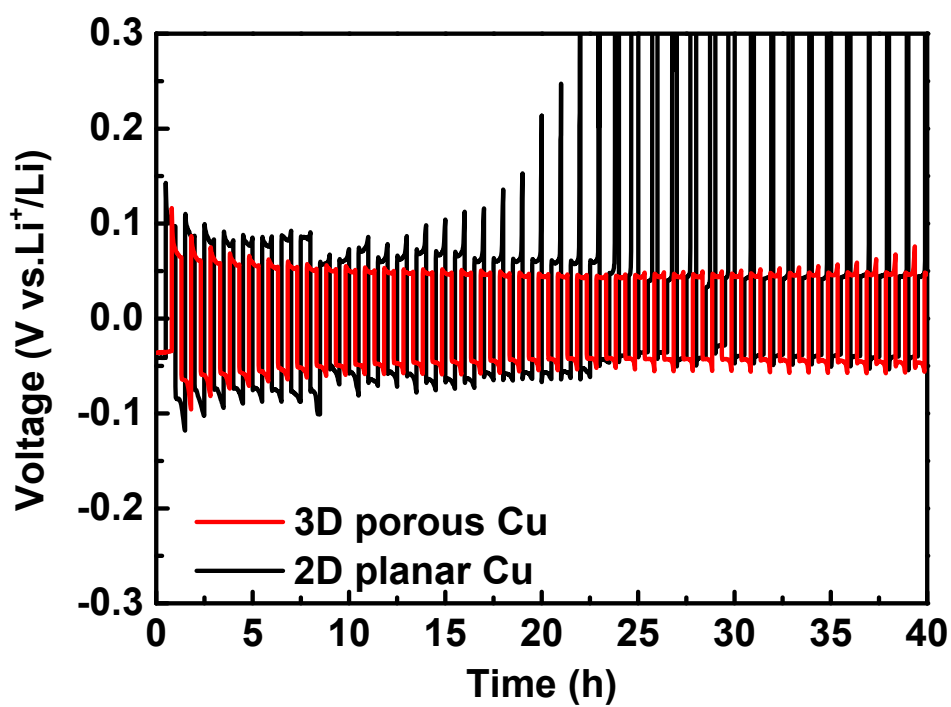

**Fig. S9.** Voltage profiles of Li plating/stripping on the 2D planar and 3D porous Cu current collectors at  $2 \text{ mA cm}^{-2}$  with the capacity of  $1 \text{ mAh cm}^{-2}$ . The plating/stripping of Li was controlled by the capacity.

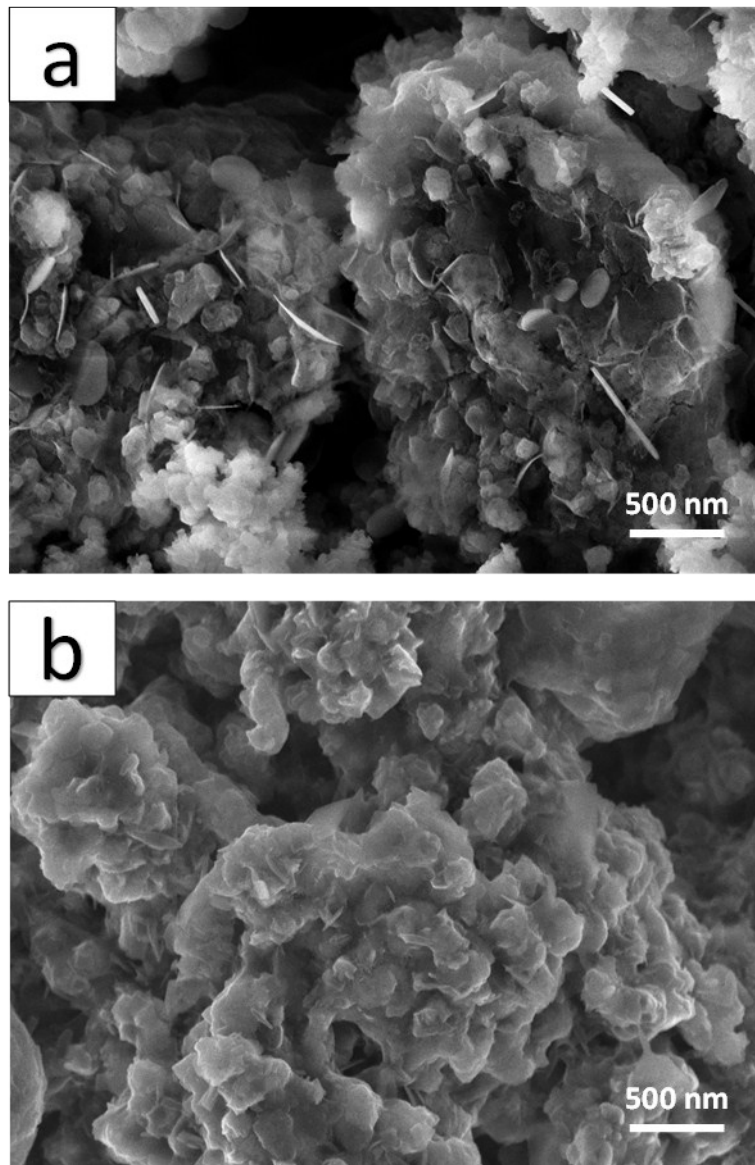

**Fig. S10.** High-magnification SEM images of the morphology of Li deposited on (a) 2D planar and (b) 3D porous Cu current collectors at  $0.5 \text{ mA cm}^{-2}$  for a total capacity of  $1 \text{ mAh cm}^{-2}$ .

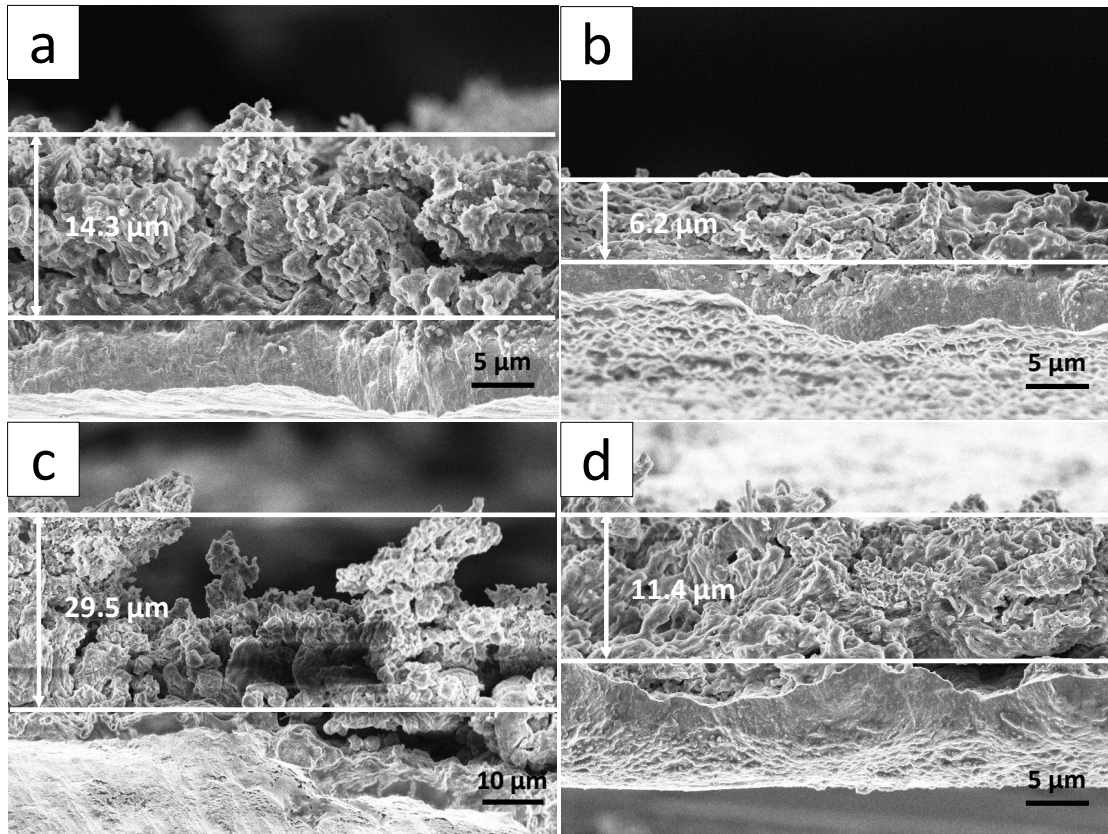

**Fig. S11.** Cross-sectional SEM images of Li deposited on 2D planar and 3D porous Cu current collectors with a current density of  $0.5 \text{ mA cm}^{-2}$  for a total capacity of  $1 \text{ mAh cm}^{-2}$ . (a, c) SEM images of the 2D planar current collector after the 1<sup>st</sup> and 20<sup>th</sup> Li plating. (b, d) SEM images of the 3D porous current collector after the 1<sup>st</sup> and 20<sup>th</sup> Li plating.

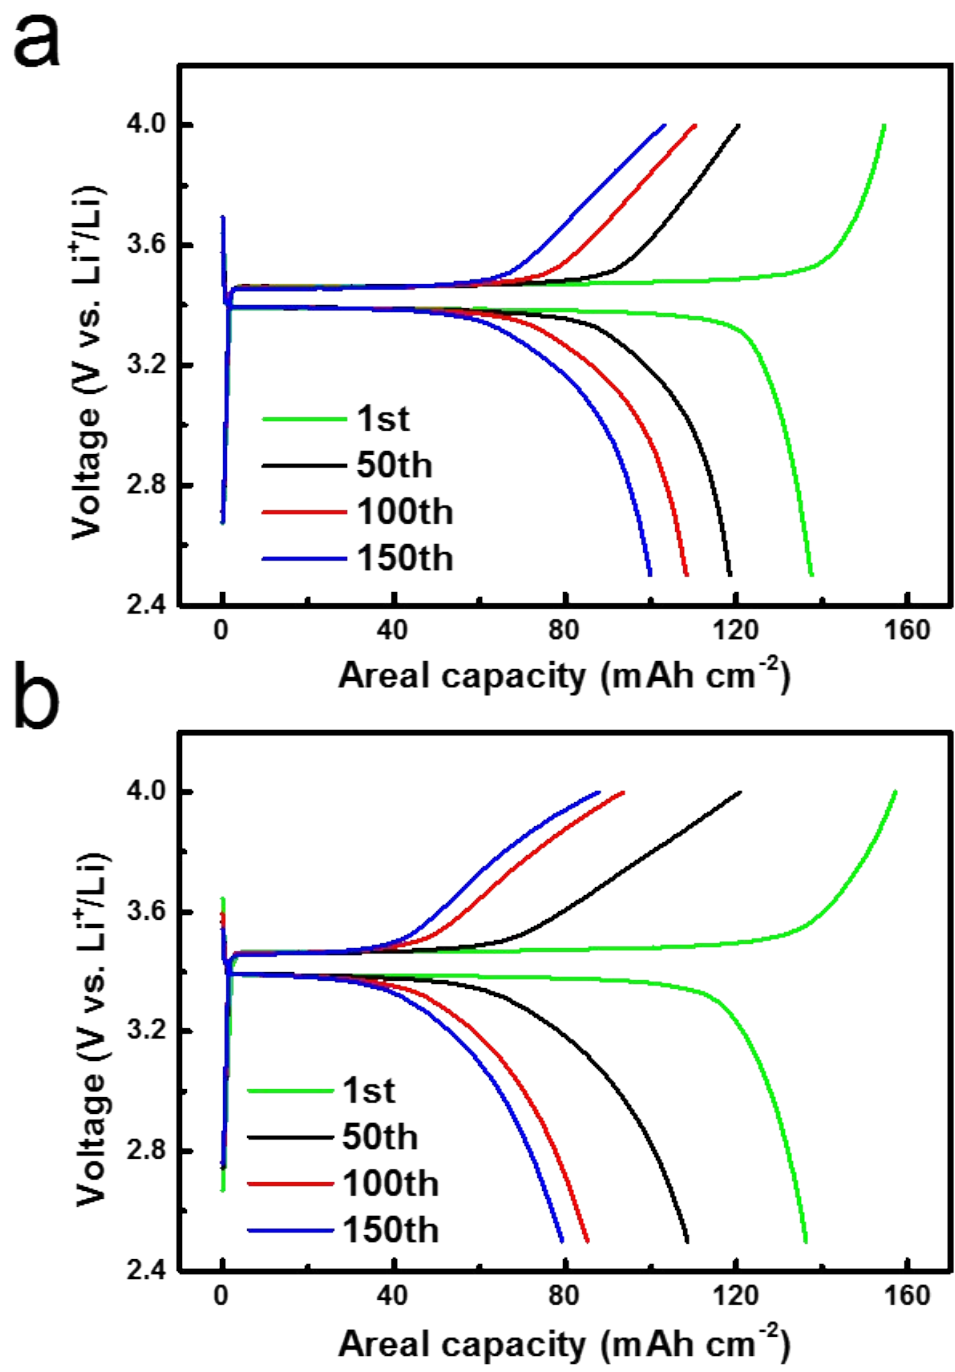

**Fig. S12.** Voltage profiles of Li anode with (a) 3D porous Cu and (b) 2D planar Cu current collectors in full cells with the LiFePO<sub>4</sub> cathode.

**Table S1.** Simulated results of EIS test of 2D planar Cu

| State                | $R_e(\Omega)$ | $R_{sei}(\Omega)$ | $R_{ct}(\Omega)$ | $R_{sei}+R_{ct}$ |
|----------------------|---------------|-------------------|------------------|------------------|
| Before cycling       | 1.5           | /                 | 459.2            | 459.2            |
| After the 1st cycle  | 1.6           | 13.2              | 144.7            | 157.9            |
| After the 5th cycle  | 1.4           | 7.2               | 33.9             | 41.1             |
| After the 10th cycle | 2.0           | 24.9              | 22.8             | 47.7             |

**Table S2.** Simulated results of EIS test of 3D porous Cu

| State                | $R_e(\Omega)$ | $R_{sei}(\Omega)$ | $R_{ct}(\Omega)$ | $R_{sei}+R_{ct}$ |
|----------------------|---------------|-------------------|------------------|------------------|
| Before cycling       | 1.2           | /                 | 123.9            | 123.9            |
| After the 1st cycle  | 2.1           | 11.0              | 43.9             | 54.9             |
| After the 5th cycle  | 1.9           | 16.3              | 18.8             | 35.1             |
| After the 10th cycle | 1.9           | 5.2               | 26.5             | 31.7             |
